# Supplementary material for: Role of Presenilin-1 in Aggressive Human Melanoma
Source: MDPI journal article supplement (doi:10.3390/ijms23094904), 2022-04-28
Supplement: s1 [file s1]

| Case | Diagnosis   | TNM     | Stage | PS-IHC<br>score |
|------|-------------|---------|-------|-----------------|
| 1    | normal skin | -       | -     | 2               |
| 2    | normal skin | -       | -     | 2               |
| 3    | normal skin | -       | -     | 2               |
| 4    | normal skin | -       | -     | 2.5             |
| 5    | normal skin | -       | -     | 3               |
| 6    | normal skin | -       | -     | 2.3             |
| 7    | normal skin | -       | -     | 1               |
| 8    | normal skin | -       | -     | 2.3             |
| 9    | normal skin | -       | -     | 2               |
| 10   | normal skin | -       | -     | 2               |
| 11   | melanoma    | T1N0M0  | 1A    | 0.67            |
| 12   | melanoma    | T2aN0M0 | 1B    | 0               |
| 13   | melanoma    | T2aN0M0 | 1B    | 1.33            |
| 14   | melanoma    | T2aN0M0 | 1B    | 2.67            |
| 15   | melanoma    | T2aN0M0 | 1B    | 3.67            |
| 16   | melanoma    | T3N0M0  | 2A    | 0               |
| 17   | melanoma    | T4N0M0  | 2B    | 1.17            |
| 18   | melanoma    | T4N0M0  | 2B    | 1.17            |
| 19   | melanoma    | T4N0M0  | 2B    | 0.33            |
| 20   | melanoma    | T4N0M0  | 2B    | 0.17            |
| 21   | melanoma    | T4N0M0  | 2B    | 0.17            |
| 22   | melanoma    | T4N0M0  | 2B    | 2.67            |
| 23   | melanoma    | T4N0M0  | 2B    | 1               |
| 24   | melanoma    | T4N0M0  | 2B    | 3.33            |
| 25   | melanoma    | T4N0M0  | 2B    | 2.33            |
| 26   | melanoma    | T4N0M0  | 2B    | 2.33            |
| 27   | melanoma    | T4N0M0  | 2B    | 3.67            |
| 28   | melanoma    | T4N0M0  | 2B    | 0               |
| 29   | melanoma    | T4N0M0  | 2B    | 1.67            |
| 30   | melanoma    | T4N0M0  | 2B    | 4               |
| 31   | melanoma    | T4N0M0  | 2B    | 0               |
| 32   | melanoma    | T4N0M0  | 2B    | 1.33            |
| 33   | melanoma    | T4N0M0  | 2B    | 0.67            |
| 34   | melanoma    | T4N0M0  | 2B    | 1               |
| 35   | melanoma    | T4N0M0  | 2B    | 0               |
| 36   | melanoma    | T4N0M0  | 2B    | 0               |
| 37   | melanoma    | T4N0M0  | 2B    | 1.67            |
| 38   | melanoma    | T4N0M0  | 2B    | 3               |
| 39   | melanoma    | T4N0M0  | 2B    | 2.33            |
| 40   | melanoma    | T4N0M0  | 2B    | 3               |
| 41   | melanoma    | T4N0M0  | 2B    | 1               |
| 42   | melanoma    | T4N0M0  | 2B    | 1.33            |
| 43   | melanoma    | T4N0M0  | 2B    | 3               |
| 44   | melanoma    | T4N0M0  | 2B    | 0.67            |

| Case | Diagnosis | TNM    | Stage | PS-IHC<br>score |
|------|-----------|--------|-------|-----------------|
| 45   | melanoma  | T4N0M0 | 2B    | 2               |
| 46   | melanoma  | T4N1M0 | 3     | 0               |
| 47   | melanoma  | T4N1M0 | 3     | 0.33            |
| 48   | melanoma  | T4N2M0 | 3     | 1               |
| 49   | melanoma  | T4N2M0 | 3     | 1               |
| 50   | melanoma  | T4N1M0 | 3     | 0.67            |
| 51   | melanoma  | T4N1M0 | 3     | 0.67            |
| 52   | melanoma  | T4N1M0 | 3     | 2               |
| 53   | melanoma  | T4N1M0 | 3     | 2               |
| 54   | melanoma  | T4N2M0 | 3     | 2.67            |
| 55   | melanoma  | T4N0M1 | 4     | 1               |
| 56   | melanoma  | T4N0M1 | 4     | 1               |
| 57   | melanoma  | na     | 4     | 0               |
| 58   | melanoma  | na     | 4     | 0               |
| 59   | melanoma  | na     | 4     | 0               |
| 60   | melanoma  | na     | 4     | 0               |
| 61   | melanoma  | na     | 4     | 0               |
| 62   | melanoma  | na     | 4     | 0               |
| 63   | melanoma  | na     | 4     | 1               |
| 64   | melanoma  | na     | 4     | 1               |
| 65   | melanoma  | na     | 4     | 1               |
